# Supplementary material for: The Reverse Warburg Effect Is Associated with Fbp2-Dependent Hif1α Regulation in Cancer Cells Stimulated by Fibroblasts
Source: PubMed Central journal article supplement (PMC7016812; doi:10.3390/cells9010205), 2020-01-14
Supplement: cells-09-00205-s001.pdf [file cells-09-00205-s001.pdf]

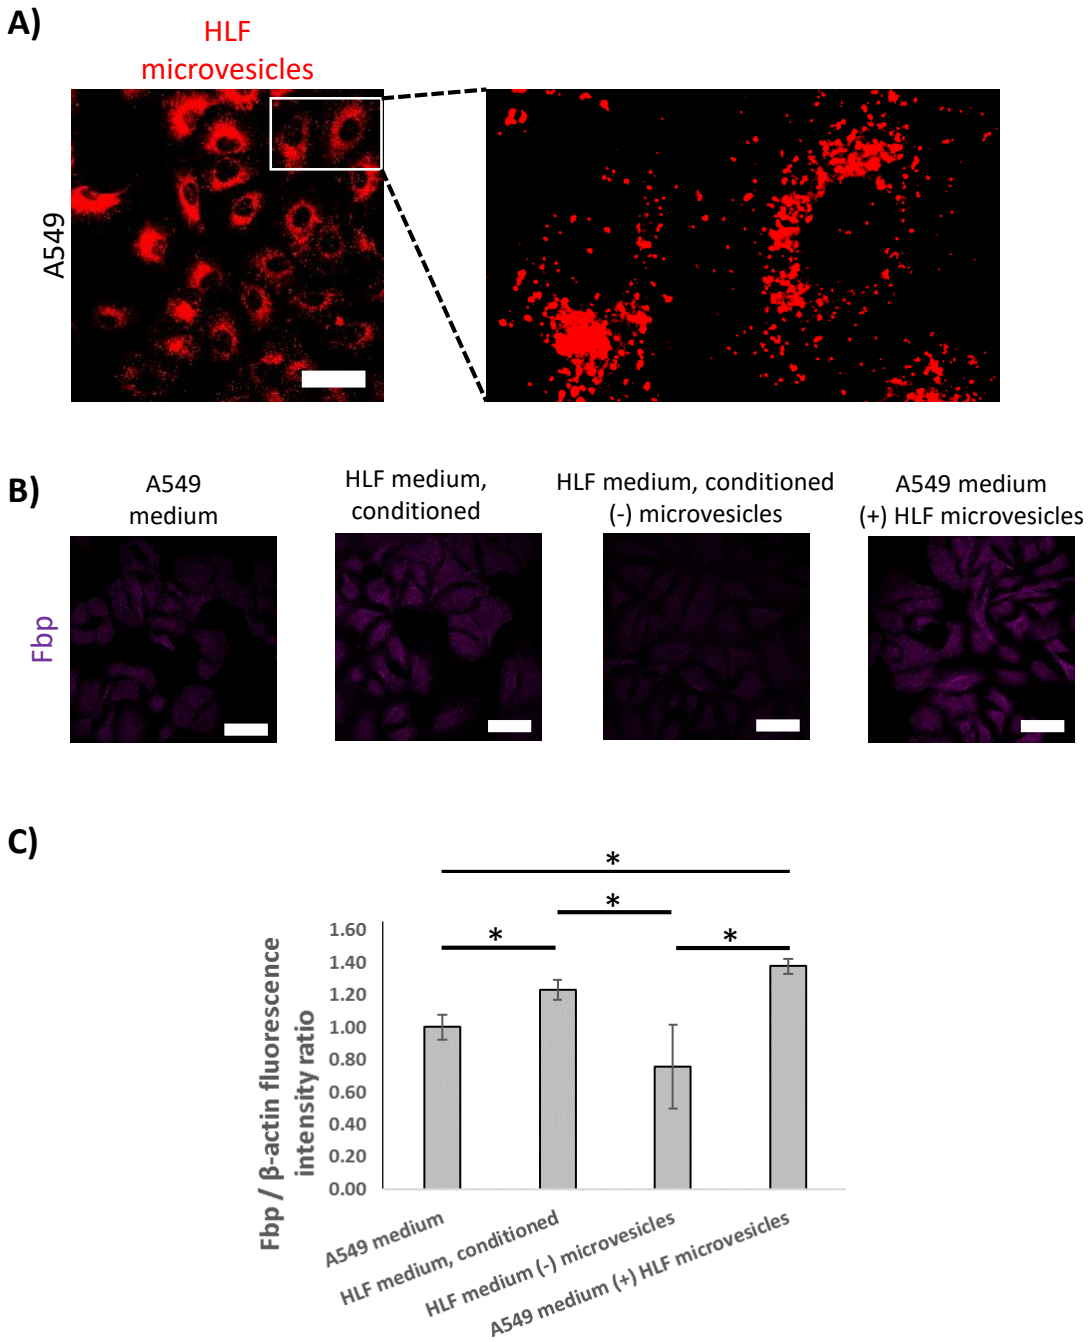

### Supplementary Figure 1

#### The effect of fibroblast-conditioned medium on Fbp expression in the A549 cancer cells

A) A549 cells absorb the fibroblast-derived microvesicles isolated from the medium obtained from the 48h culture of HLF cells (so-called “conditioned medium”).

B) The microvesicle cargo increases the amount of Fbp in the cancer cells, in contrast to the components of the microvesicle-deprived conditioned medium (C).

Bar=50  $\mu$ m. The results are expressed as mean and standard deviation. Asterisks indicate a statistically significant difference ( $p < 0.05$ ).

All the experiments were performed in triplicate with similar results and representative data from one experiment is shown in the figure.
